# Supplementary material for: Landscape of human gut antibiotic resistome and progression of diabetes
Source: bioRxiv or medRxiv preprint supplement (doi:10.1101/2021.06.24.21259507), 2021-06-25
Supplement: Supplementary file [file media-1.pdf]

1 **Supplementary Materials**

2 **Landscape of human gut antibiotic resistome and progression of diabetes**

3 Menglei Shuai<sup>1,2#</sup>, Guoqing Zhang<sup>3,4#</sup>, Fang-fang Zeng<sup>5,6#</sup>, Yuanqing Fu<sup>1,2,7#</sup>, Xinxiu Liang<sup>1,2</sup>, Ling

4 Yuan<sup>3,4</sup>, Fengzhe Xu<sup>1,2</sup>, Wanglong Gou<sup>1,2</sup>, Zelei Miao<sup>1,2</sup>, Zengliang Jiang<sup>1,2,7</sup>, Jia-ting Wang<sup>5</sup>, Lai-

5 bao Zhuo<sup>5</sup>, Yu-ming Chen<sup>5\*</sup>, Feng Ju<sup>2,3,4\*</sup>, Ju-Sheng Zheng<sup>1,2,7\*</sup>

6

7 **This word file includes:**

8 Materials and Methods

9 **Study design and participants**

10 **Metadata collection**

11 **Fecal metagenomics profiling**

12 **Genotyping data**

13 **Targeted fecal metabolome profiling**

14 **Statistical analysis**

15

16 Figs. S1 to S10

17 **Fig. S1. Flow diagram of participants' selection for the analyses of present study.**

18 **Fig. S2. Workflow for analysis of metagenomics sequencing data.**

19 **Fig. S3. Abundance and prevalence of gut antibiotic resistome in GNHS.**

20 **Fig. S4. The effect sizes of host factors in gut antibiotic resistome grouped by**  
21 **diabetes status.**

22 **Fig. S5. Correlations between gut antibiotic resistome diversity and microbiota.**

23 **Fig. S6. The comparison of inter-individual Bray-Curtis distance of gut antibiotic**  
24 **resistome.**

25 **Fig. S7. The performance of models based on LASSO feature selection.**

26 **Fig. S8. Veen plot of biomarkers identified by LASSO models.**

27 **Fig. S9. Networks of co-occurring T2D-related ARGs and gut microbiota,**  
28 **grouped by diabetes status.**

29 **Fig. S10. Associations between gut antibiotic resistome features and fecal**  
30 **metabolites (n = 1012).**

31

## 32 **Materials and Methods**

### 33 **Genotyping data**

34 Host DNA was extracted from leukocytes using the TIANamp® Blood DNA Kit  
35 (DP348, TianGen Biotech Co, Ltd., China) according to the manufacturer's  
36 instructions. DNA concentrations were determined using the Qubit quantification  
37 system (Thermo Scientific, Wilmington, DE, USA). Extracted DNA was stored at  
38  $-80\text{ }^{\circ}\text{C}$ . Genotyping was carried out with Illumina ASA-750K arrays. Quality control  
39 and relatedness filters were performed by PLINK1.9<sup>1</sup>. Individuals with a high or low  
40 proportion of heterozygous genotypes (outliers defined as 3 standard deviations) were  
41 excluded<sup>2</sup>. Individuals who had different ancestries (the first two principal  
42 components  $\pm 5$  standard deviations from the mean) or related individuals (IBD  $>$   
43 0.185) were excluded<sup>2</sup>. Variants were mapped to the 1000 Genomes Phase 3 v5 by  
44 SHAP EIT<sup>3,4</sup>, and then we conducted genome-wide genotype imputation with the  
45 1000 Genomes Phase 3 v5 reference panel by Minimac3<sup>5,6</sup>. Genetic variants with  
46 imputation accuracy RSQR  $> 0.3$  and MAF  $> 0.05$  were included in our analysis.

47

### 48 **Targeted fecal metabolome profiling**

49 The absolute quantification of fecal samples (n = 1012) was performed by an ultra-  
50 performance liquid chromatography coupled to tandem mass spectrometry (UPLC-  
51 MS/MS) system. Briefly, the order of all samples was randomly selected prior to  
52 preparation. 10 mg lyophilized feces were homogenized with 25 $\mu\text{L}$  water and  
53 extracted with 185 $\mu\text{L}$  cold ACN-Methanol (8/2, v/v). At Biomek 4000 station

54 (Biomek 4000, Beckman Coulter, Inc., Brea, California, USA), 30µl centrifuged  
55 supernatant was derived with 20µl freshly prepared derivatives and mixed with  
56 internal standards in 30°C for 60min. The derivatization agents were 200 mM 3-NPH  
57 in 75% aqueous methanol and 96 mM EDC-6% pyridine solution in methanol. After  
58 derivatization, 350µl ice-cold 50% methanol solution was added to dilute the sample  
59 and then retained at -20°C for 20 minutes. After 4000g centrifugation at 4 °C for 30  
60 minutes, 135µl supernatant was mixed and sealed with internal standards for each  
61 sample. Subsequently, the derivatized samples and serial dilutions of derivatized stock  
62 standards were analyzed randomly and quantitated by the UPLC-MS/MS. The  
63 instrument setting was: ACQUITY UPLC BEH C18 analytical column (2.1\*100  
64 mm,1.7µM); column temperature 40 °C; flow rate 0.4 mL/min; mobile phases A  
65 (water with 0.1% formic acid), mobile phases B (acetonitrile: IPA, 90:10); 0-1 min (5%  
66 B), 1-12 min (5-80% B), 12-15 min (80-95% B), 15-16 min (95-100%B), 16-18 min  
67 (100%B), 18-18.1 min (100-5% B), 18.1-20 min (5% B); 1.5Kv (ESI+), 2.0Kv (ESI-)  
68 capillary.

69

70 Three types of quality control samples, i.e. test mixtures, internal standards, and  
71 pooled biological samples were used in the metabolomics platform. The internal  
72 standards were added to the test samples in order to monitor analytical variations  
73 during the entire sample preparation and analysis process. The derivatized pooled  
74 samples for quality control were injected per 14 samples. Raw data generated by  
75 UPLC-MS/MS were processed using the QuanMET software (v2.0, Metabo-Profile,

76 Co., Ltd, Shanghai, China) to perform peak integration, calibration, and quantification  
77 for each metabolite. The list of metabolites was selected to capture the microbiota-  
78 related metabolites and some key host metabolites. Finally, 117 metabolites were  
79 selected. These metabolites mainly include amino acids, bile acids and fatty acids.

80

### 81 **Statistical analysis**

82 All statistical analyses were performed using Stata version 15 or R version 4.0.2.

83 Participants were categorized into three groups (healthy, prediabetes and T2D) based  
84 on their diabetes status. To explore the compositional variation of gut antibiotic  
85 resistome, we correlated 37 factors (including demography, physiology and dietary  
86 factors) to the ARG subtype distance matrix (Bray-Curtis) using permutational  
87 multivariate analysis of variance (PERMANOVA). We then used Pearson correlation  
88 analysis to examine the association between  $\alpha$ -diversity of gut antibiotic resistome  
89 and microbial gene richness. The principle coordinates analysis (PCoA) on Bray-  
90 Curtis distance and PERMANOVA were performed to examine the structural  
91 differences of gut antibiotic resistome and gut microbiota among three different  
92 groups using the *adonis* function (permutations = 999). In addition, Procrustes  
93 analysis was performed to investigate the relationship between gut antibiotic  
94 resistome and gut microbiota, and the *p* value was generated based on 999  
95 permutations. We then examined the association between  $\alpha$ -diversity indices of gut  
96 antibiotic resistome and gut microbiota and prevalent T2D using a logistic regression  
97 model, adjusted for potential confounders as follows: age, sex, body mass index

98 (BMI), physical activity, smoking status, drinking status, education attainment,  
99 household income level, Bristol stool scale and MGR. The  $\alpha$ -diversity indices were z-  
100 score normalized before regression analysis.

101

102 To identify the markers of T2D, we used the least absolute shrinkage and selection  
103 operator (LASSO) regression model with 5 repeated 5-fold cross-validations based on  
104 the gut ARGs, microbial species and main covariates (age, sex, BMI, physical activity,  
105 smoking status, drinking status, education attainment, household income level,  
106 systolic blood pressure, diastolic blood pressure and Bristol stool scale). LASSO was  
107 implemented in the R package *glmnet* using a binomial response type for binary  
108 dependent variables (Non-T2D (healthy and prediabetes)/T2D, healthy/T2D,  
109 prediabetes/T2D)<sup>7</sup>. We assessed the predictive performance of the selected models by  
110 estimating the area under the receiver operation curve (AUC) for binary responses  
111 ( $\alpha = 1$ ; 100 lambda tested) (Fig S6). The selected value of ‘lambda.min’ was  
112 defined using cross-validation, the lambda controls the overall impact of LASSO.  
113 Then we merged the features with nonzero coefficients of the three models (Non-  
114 T2D/T2D, healthy/T2D, prediabetes/T2D) as markers of T2D progression.

115

116 Subsequently, the abundances of the markers were z score transformed. We used  
117 Kruskal-Wallis test and Mann-Whitney U test to examine the abundance differences  
118 of the marker ARGs and microbial species among healthy, prediabetes and T2D  
119 groups. The logistic regression was performed to investigate the odds ratio of the

120 markers for risk of T2D after adjustment for age, sex, BMI, smoking status, drinking  
121 status, education attainment, income level and physical activity. Here,  $p$  values were  
122 controlled by Benjamini-Hochberg method for multiple tests. FDR-corrected or raw  $p$   
123 values  $< 0.05$  were considered to be significant.

124

125 ***Genome-wide association analysis of T2D-related ARG features.*** To further examine  
126 the probability that ARG features increased the risk of T2D, GWAS for ARG  $\alpha$ -  
127 diversity indices and T2D positively related ARG markers were conducted in 947  
128 participants with both host genetic and metagenomics data. For the targeted ARG  
129 features, we used log transformation and z-score normalization to change the skewed  
130 distribution before GWAS analysis. A mixed linear model-based leave-one-  
131 chromosome-out association (MLMA-LOCO) analysis in GCTA was used to assess  
132 the association, fitting the first five genetic principal components of ancestry, age and  
133 sex as fixed effects and the effects of all the SNPs as random effects<sup>8</sup>.

134

135 ***One sample Mendelian randomization analysis.*** To test if ARG features were  
136 causally linked to T2D, the genetic variants used for one sample MR analysis were  
137 extracted from the GNHS study with a moderate cutoff of  $p < 5 \times 10^{-5}$ . The weighted  
138 polygenic risk score for each trait was constructed with the effect size from the  
139 additive model. The two-stage one-sample analysis was implemented to estimate the  
140 potential casual association. The first stage included a regression of the ARGs or  $\alpha$ -  
141 diversity index on the polygenic risk score, adjusted for age at the time of stool

142 sample collection, sex and the first five genetic principal components of ancestry. The  
143 second stage included a logistic regression of T2D using the prediction value  
144 constructed with the first stage regression, adjusted for age, sex and the first five  
145 genetic principal components of ancestry. Results were presented as odds ratio per 1-  
146 SD increase in polygenic risk score.

147

148 Based on the identified T2D-related ARGs, we constructed a diabetes-ARG score  
149 (DAS) as a new feature to represent the gut antibiotic resistome associated with T2D.

150 We used the formula to compute DAS as follows:

$$151 \text{ DAS} = \sum_1^n (\text{OR}_i - 1) \times A_i \quad (2)$$

152 Where n is the number of marker ARGs of T2D progression;  $\text{OR}_i$  is the odds ratio of  
153 the i-th marker for risk of T2D;  $A_i$  is the i-th normalized abundance (z score) of ARGs.

154

155 To test the reliability of DAS, we performed a logistic regression analysis to examine  
156 the cross-sectional association between DAS and T2D, adjusted for potential  
157 confounders. In addition, we assessed the cross-sectional correlation between DAS  
158 and glycemic traits, including fasting blood glucose, HbA1c, insulin and HOMA-IR  
159 (homeostatic model assessment of insulin resistance). The linear regression analysis  
160 was performed after adjustment for age, sex, BMI, smoking status, drinking status,  
161 education attainment, income level, physical activity. Considering that T2D related  
162 taxonomies of the gut microbiota may confound the above association, we also  
163 adjusted the Diabetes-Microbiota Score (DMS) constructed by the same method as



164 DAS. Moreover, the linear mixed models were used to examine the longitudinal  
165 association between DAS (baseline) and glycemic traits (repeat measure at baseline  
166 and follow-up visit) after excluding the baseline T2D cases, adjusted for age, sex,  
167 BMI, smoking status, drinking status, education attainment, income level, physical  
168 activity and DMS. In addition, we used a multivariable linear regression model to  
169 assess the cross-sectional association of the gut antibiotic resistome features  
170 (including DAS and  $\alpha$ -diversity indices) with other cardiometabolic risk factors,  
171 including BMI, waist circumference, total cholesterol, triglycerides, HDL cholesterol,  
172 LDL cholesterol, TC/HDL ratio, systolic blood pressure and diastolic blood pressure.  
173 The dependent variables with skewed distribution were log-transformed before  
174 analysis (fasting blood glucose, insulin, HOMA-IR, TC/HDL-C and TG). The  
175 regression associations were expressed as the difference in cardiometabolic risk  
176 factors (in SD unit) per 1 SD difference in each gut antibiotic resistome feature.

177

178 As we only used the resistome information at baseline of the cohort, it might be that  
179 the gut antibiotic resistome would change over time. To address this concern, we  
180 performed a Procrustes analysis in 278 participants of the cohort with a median  
181 follow-up of 3.2 years. The fecal samples of these participants were collected twice  
182 (baseline and a follow-up visit).

183

184 ***Network analysis of ARG-microbe associations.*** Spearman correlation analysis was  
185 performed to examine the associations between T2D-related ARGs and T2D-related

186 gut microbial species, based on ‘Co-occurrence Network Analysis’ package  
187 ([github.com/RichieJu520](https://github.com/RichieJu520))<sup>9</sup>. To explore the underlying associations among T2D-  
188 related ARGs and all gut microbial species, we constructed a correlation matrix by  
189 calculating the pairwise Spearman correlation coefficients. A correlation between  
190 ARG-ARG, species-species, or ARG-species was considered significant if FDR-  
191 corrected  $p < 0.05$ . We further applied Gephi to visualize the correlations (Spearman’s  
192 rho was  $\geq 0.3$ ) in a network interface and explore its topological properties.

193

194 To fully explore the hidden deterministic (or non-random) co-occurrence patterns, we  
195 also computed the global co-occurrence associations between all the gut ARGs and  
196 microbial species identified. The observed (O%) and random incidences (R%) of co-  
197 occurrence correlation between two group entities (i.e., ARG and/or species) were  
198 statistically checked using the method as described previously<sup>9,10</sup>. Briefly, O% was  
199 calculated as the number of observed edges divided by total number of edges in the  
200 observed network, while R% was theoretically calculated by considering the  
201 frequencies of two group entities and assuming random association. Here co-  
202 occurrence patterns with Spearman’s rho  $\geq 0.6$ , O%  $\geq 1.0$  / R%  $\geq 1.0$ , and O/R  $\geq 1.5$   
203 / O/R  $\leq 0.5$  were considered as significant difference.

204

205 We finally used Spearman correlation analysis to investigate the associations between  
206 gut antibiotic resistome features (DAS, *Multidrug\_emrE*, *Vancomycin\_vanX*,

207 *Quinolone\_norB* and *MLS\_ermX*) and 117 fecal metabolites. The concentrations of  
208 the metabolites were transformed to z-scores before analysis.

**Fig. S1. Flow diagram of participants' selection for the analyses of present study.**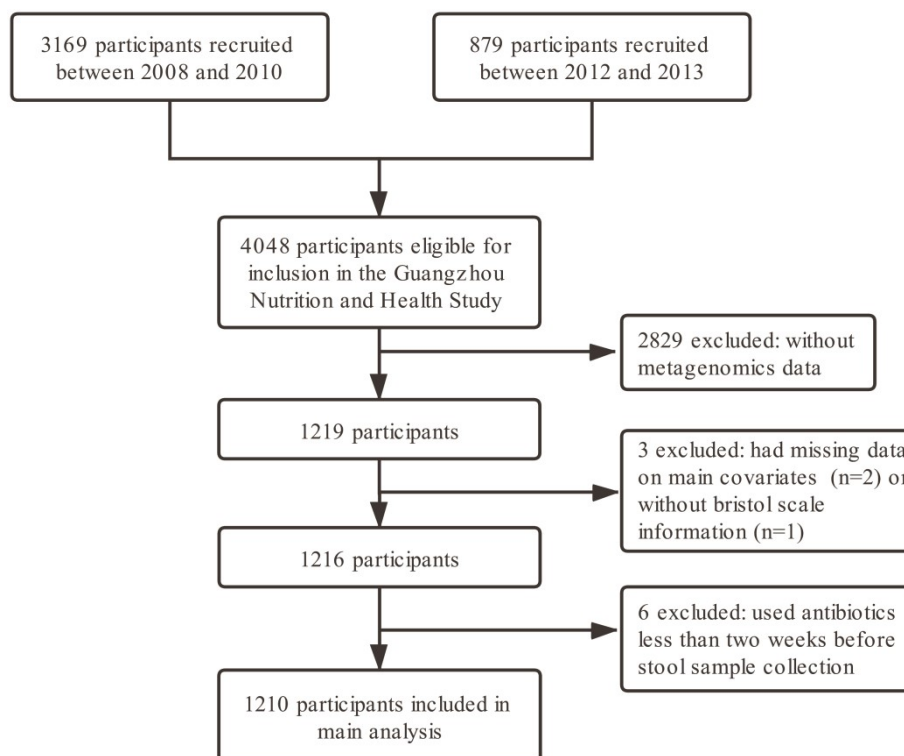

**Fig. S2. Workflow for analysis of metagenomics sequencing data.** Two distinct but complementary pipelines were used for metagenomics analysis. 19 antibiotic resistance gene (ARG) types and 805 ARG subtypes were annotated using ARG-OAP2. 639 microbial bacteria species were identified using MetaPhlAn2. PCoA, principal coordinates analysis.

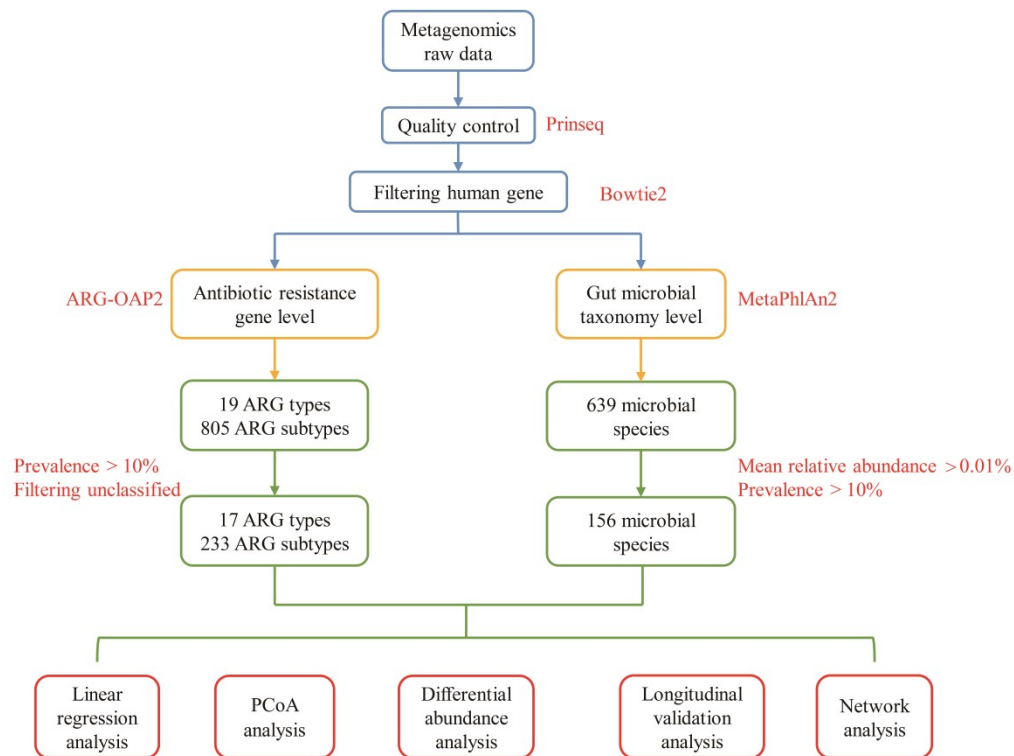

**Fig. S3. Abundance and prevalence of gut antibiotic resistance in GNHS.** **A**, The bar chart shows the prevalence of 17 antibiotic resistance genes (ARGs) types in participants with different diabetes status. **B**, The curve shows the association between ARGs subtype numbers and the prevalence among Healthy (n = 531), Prediabetes (n = 495) and T2D (n = 184) groups. **C**, The bar chart shows the prevalence of the ARGs types among different groups (differences between each two groups more than 3% are presented). **D**, The box plot shows the abundance of 17 core ARGs subtypes (prevalence = 100%). All box plots are the median with the interquartile range. *MLS*, *Macrolide-Lincosamide-Streptogramin*.

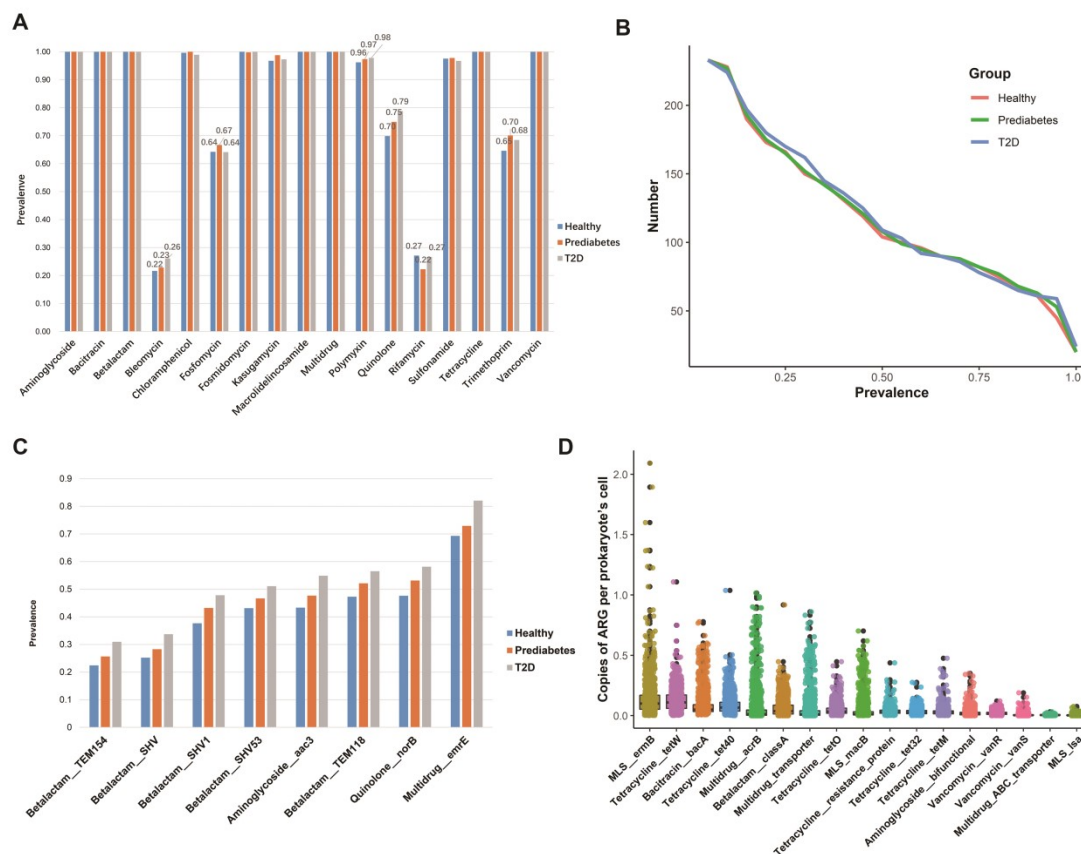

**Fig. S4. The effect sizes of host factors in gut antibiotic resistome grouped by diabetes status.** The effect sizes of host factors in human gut antibiotic resistome were calculated by PERMANOVA (Adonis, Bray-Curtis distance, permutations = 999) among Healthy (n = 392), Prediabetes (n = 401) and T2D (n = 154) groups.

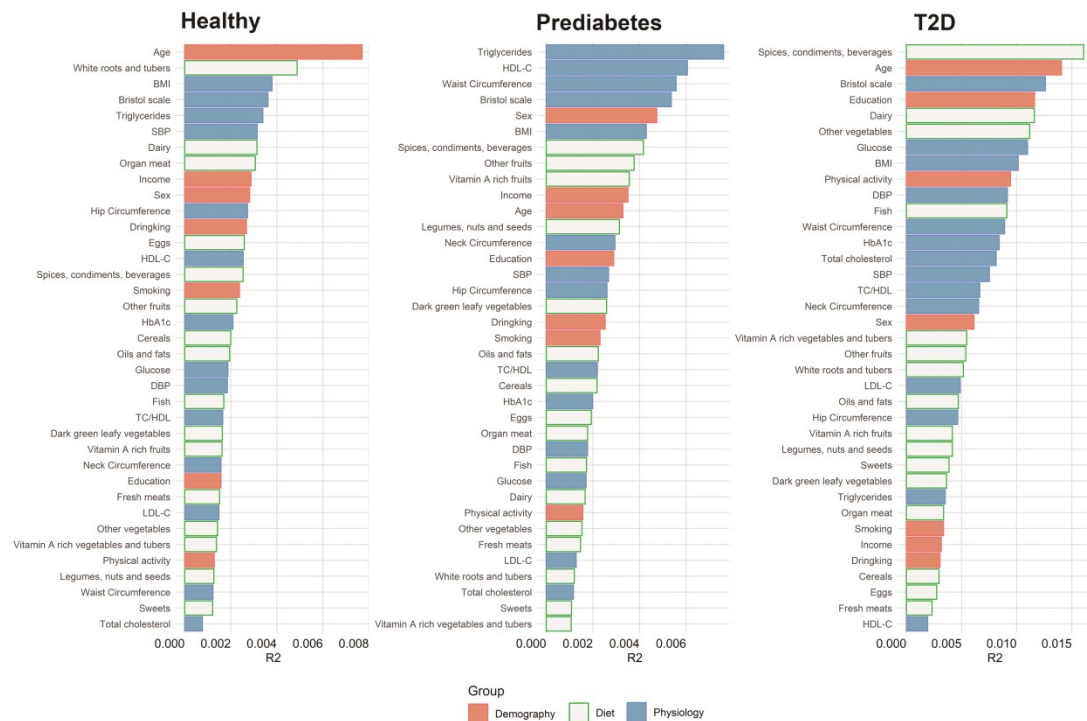

**Fig. S5. Correlations between gut antibiotic resistome diversity and microbiota.** **A, B,** Correlation between microbial gene richness (MGR) and  $\alpha$ -diversity indices (ARGs) evaluated by Pearson tests. **C,** Procrustes analysis of gut ARGs versus gut microbiota. ARGs and microbiota are shown as orange and blue dots, respectively. ARGs and microbiota from the same individual are connected by grey lines.

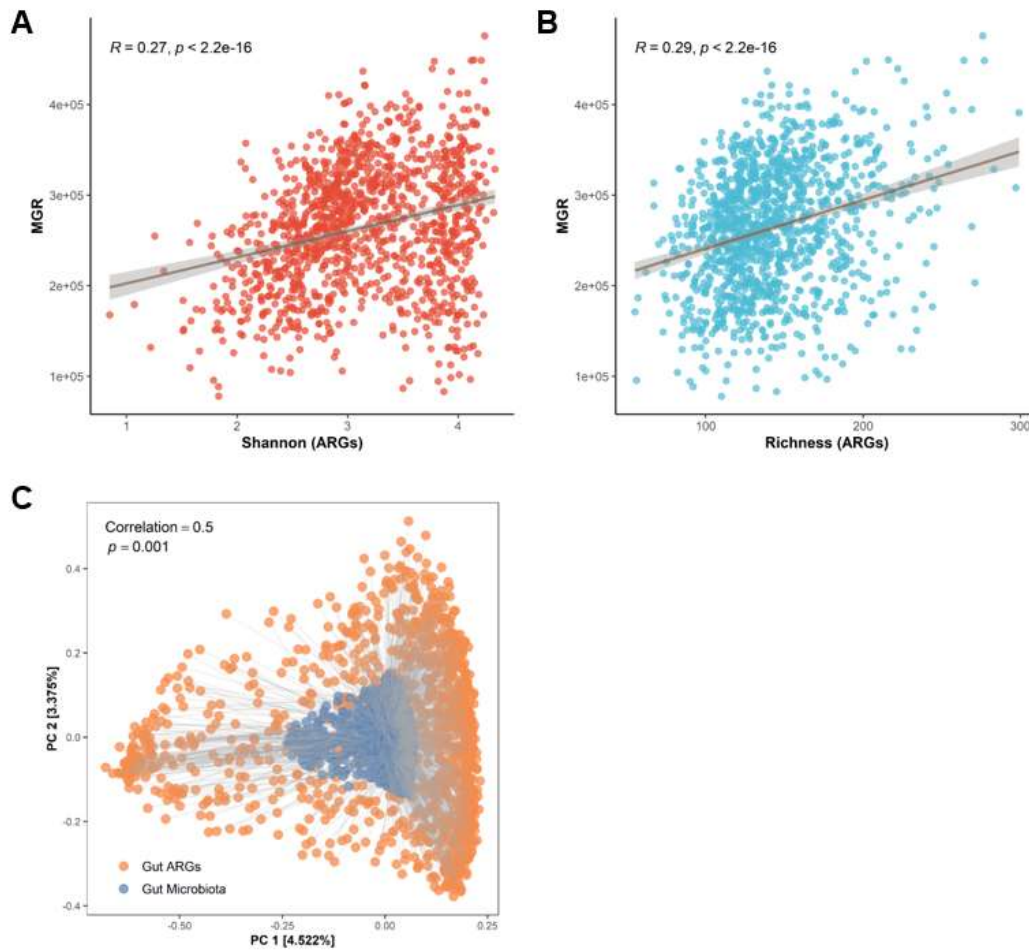



**Fig. S6. The comparison of inter-individual Bray-Curtis distance of gut antibiotic resistome.** Violin plots show the Bray-Curtis distance (y axis) among Healthy (n = 531), Prediabetes (n = 495) and T2D (n = 184) groups. *p* values from rank-based Wilcoxon test and Kruskal–Wallis test.

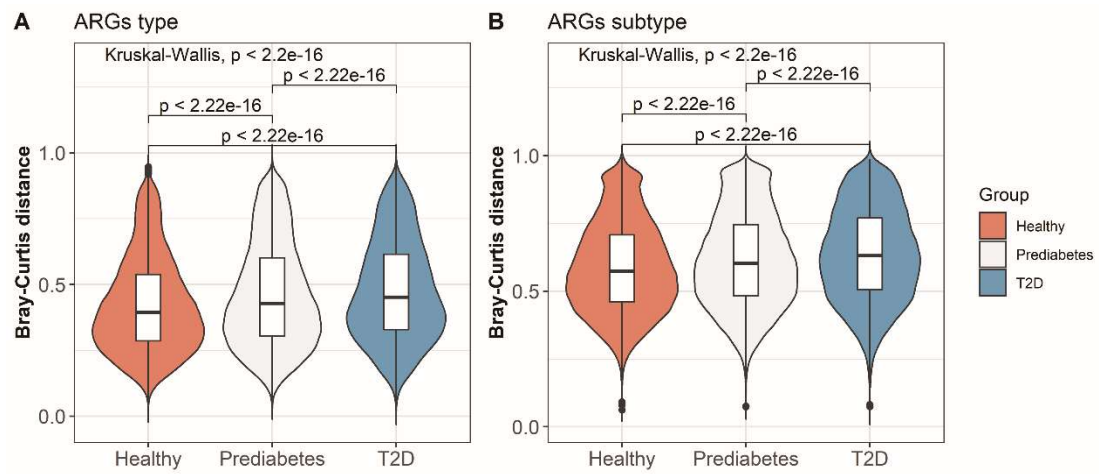

**Fig. S7. The performance of models based on LASSO feature selection.** LASSO regression models were performed with 5 repeated 5-fold cross-validations. The cross-validation AUCs were provided for both ARGs classifier (**A-C**) and microbiota classifier (**D-F**). Three dependent binary variables for antibiotic resistance genes marker selection: (**A, D**) Non-T2D (Healthy and Prediabetes)/T2D, (**B, E**) Healthy/T2D, (**C, F**) Prediabetes/T2D. LASSO, least absolute shrinkage and selection operator.

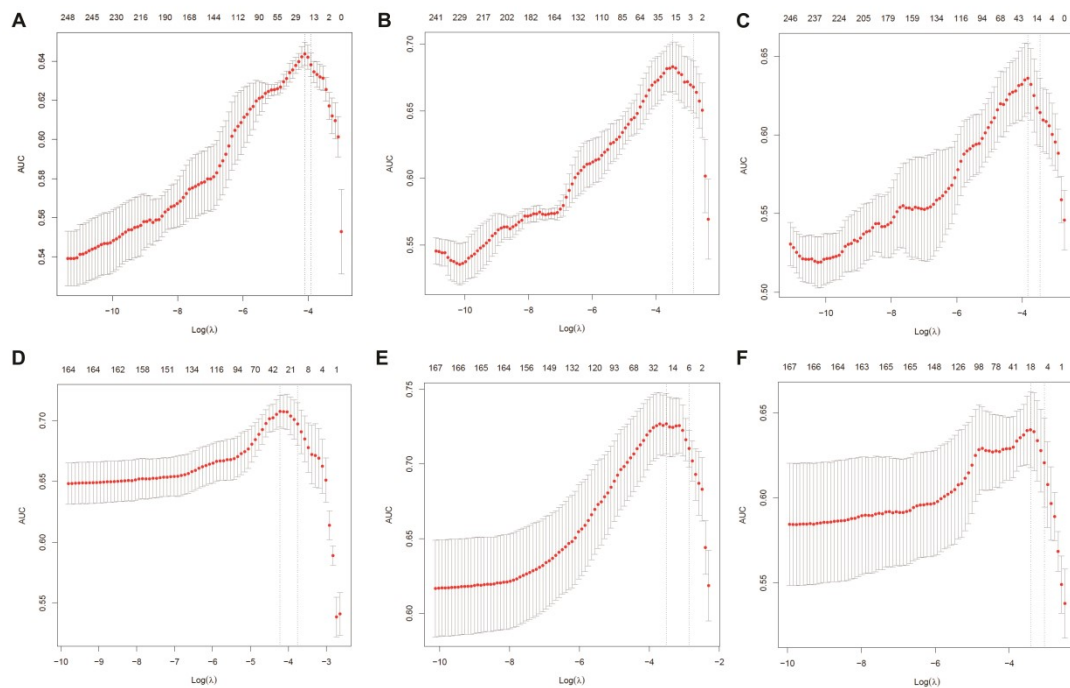

**Fig. S8. Venn plot of biomarkers identified by LASSO models.** Venn plot showing the number of biomarkers identified by gut ARGs classifier (A) and microbiota classifier (B) for different datasets: Non-T2D/T2D, Healthy/T2D and Prediabetes/T2D. LASSO, least absolute shrinkage and selection operator.

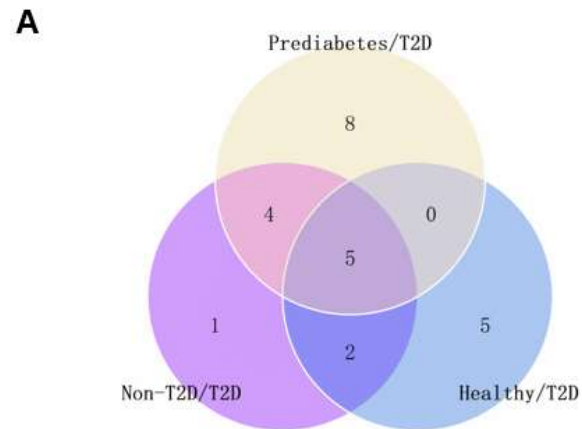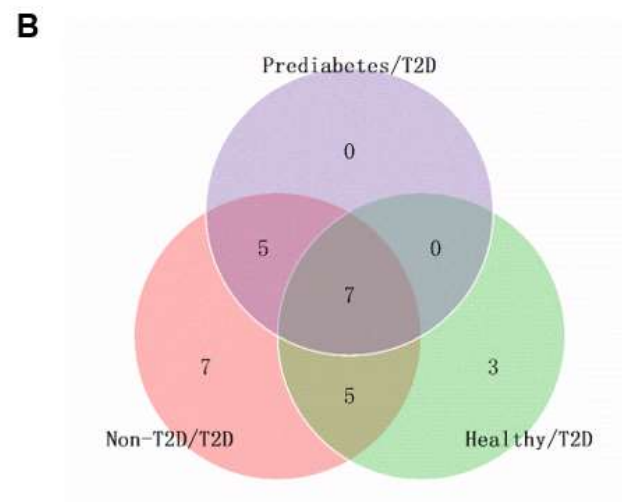

**Fig. S9. Networks of co-occurring T2D-related ARGs and gut microbiota, grouped by diabetes status.** Networks were presented based on correlation analysis among Healthy (n = 531), Prediabetes (n = 495) and T2D (n = 184) groups. A node stands for an ARG type/subtype or a species and a connection (i.e. edge) stands for a significant (FDR-corrected  $p < 0.05$ , Spearman's  $\rho \geq 0.3$ ) pairwise correlation. Network was colored by ARGs and phylums. Node size is proportional to the number of connections (i.e. degree). *Ami*, Aminoglycoside; *Bet*, Betalactam; *Chl*, Chloramphenicol; *MLS*, Macrolide-Lincosamide-Streptogramin; *Mul*, Multidrug; *Qui*, Quinolone; *Tet*, Tetracycline; *Van*, Vancomycin.

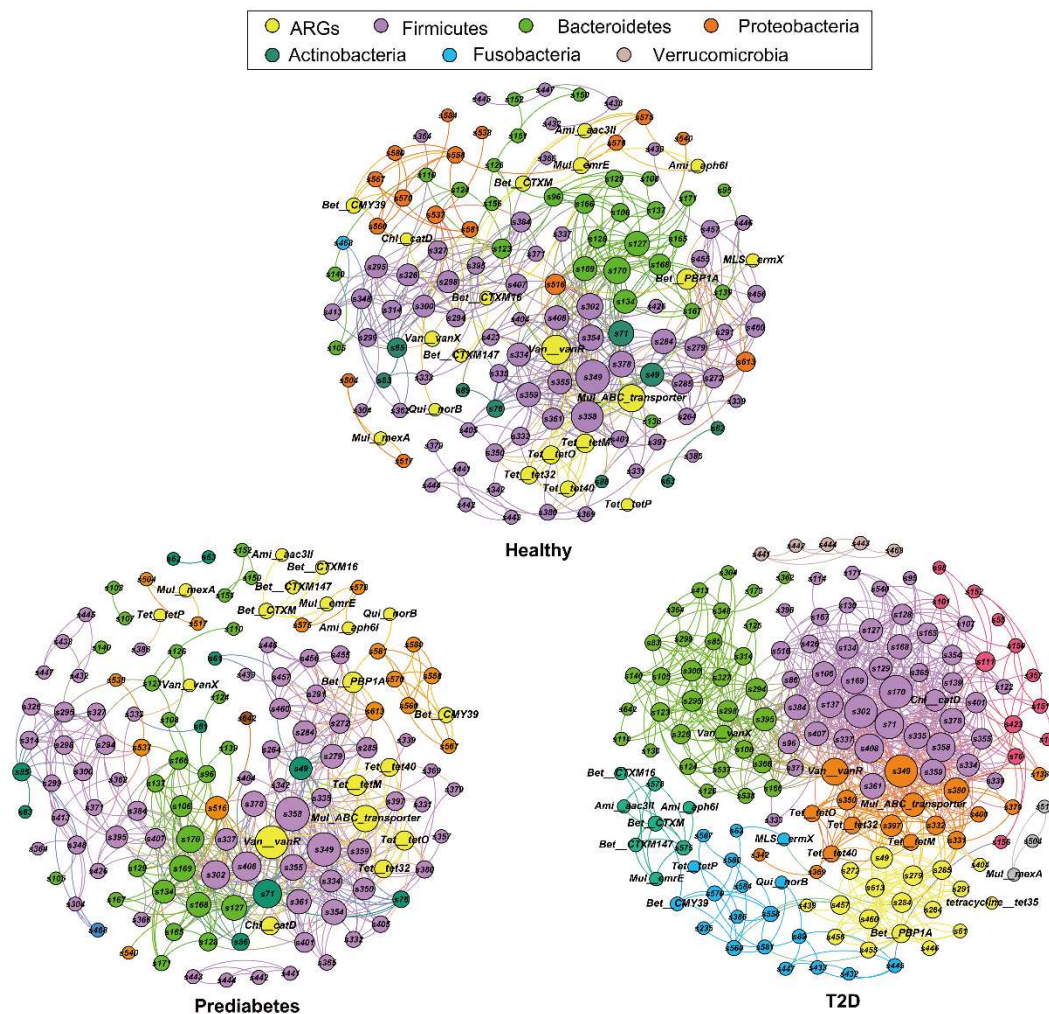

**Fig. S10. Associations between gut antibiotic resistome features and fecal metabolites (n = 1012).** The heatmap shows the Spearman correlation coefficients between gut antibiotic resistome features and fecal metabolites (purple text, showing fatty acids; yellow text, showing bile acids; blue text, showing amino acids). DAS, Diabetes-ARG score. \*FDR-corrected  $p < 0.05$ , \*\* FDR-corrected  $p < 0.01$ , \*\*\* FDR-corrected  $p < 0.001$ .

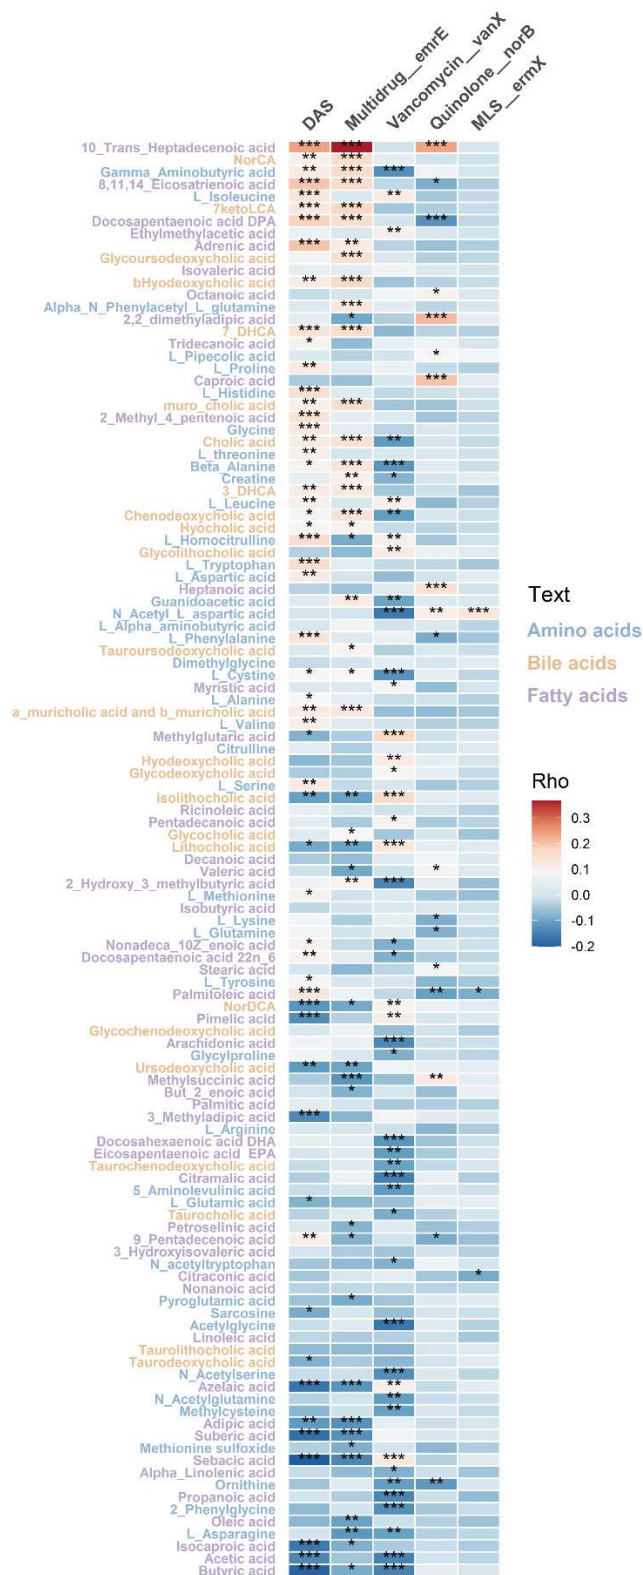

## References

- 1 Purcell, S. *et al.* PLINK: a tool set for whole-genome association and population-based linkage analyses. *Am. J. Hum. Genet.* **81**, 559-575, doi:10.1086/519795 (2007).
- 2 Anderson, C. A. *et al.* Data quality control in genetic case-control association studies. *Nat Protoc* **5**, 1564-1573, doi:10.1038/nprot.2010.116 (2010).
- 3 Delaneau, O., Marchini, J. & Zagury, J. F. A linear complexity phasing method for thousands of genomes. *Nat. Methods* **9**, 179-181, doi:10.1038/nmeth.1785 (2011).
- 4 Delaneau, O., Marchini, J., Genomes Project, C. & Genomes Project, C. Integrating sequence and array data to create an improved 1000 Genomes Project haplotype reference panel. *Nat Commun* **5**, 3934, doi:10.1038/ncomms4934 (2014).
- 5 Das, S. *et al.* Next-generation genotype imputation service and methods. *Nat. Genet.* **48**, 1284-1287, doi:10.1038/ng.3656 (2016).
- 6 Clarke, L. *et al.* The international Genome sample resource (IGSR): A worldwide collection of genome variation incorporating the 1000 Genomes Project data. *Nucleic Acids Res.* **45**, D854-D859, doi:10.1093/nar/gkw829 (2017).
- 7 Friedman, J., Hastie, T. & Tibshirani, R. glmnet: Lasso and elastic-net regularized generalized linear models. *R package version 1* (2009).
- 8 Yang, J. A., Lee, S. H., Goddard, M. E. & Visscher, P. M. GCTA: A Tool for Genome-wide Complex Trait Analysis. *Am. J. Hum. Genet.* **88**, 76-82, doi:10.1016/j.ajhg.2010.11.011 (2011).
- 9 Ju, F. & Zhang, T. Bacterial assembly and temporal dynamics in activated sludge of a full-scale municipal wastewater treatment plant. *Isme Journal* **9**, 683-695, doi:10.1038/ismej.2014.162 (2015).
- 10 Ju, F., Xia, Y., Guo, F., Wang, Z. P. & Zhang, T. Taxonomic relatedness shapes bacterial assembly in activated sludge of globally distributed wastewater treatment plants. *Environ. Microbiol.* **16**, 2421-2432, doi:10.1111/1462-2920.12355 (2014).
